# Supplementary material for: GLP-1RAs caused gastrointestinal adverse reactions of drug withdrawal: a system review and network meta-analysis
Source: PubMed Central journal article supplement (PMC10359616; doi:10.3389/fendo.2023.1149328), 2023-07-06
Supplement: DataSheet_1.pdf [file DataSheet_1.pdf]

STEP1

loop inconsistency test

| Loop                 | IF    | seIF  | z_value | p_value | CI_95       | Loop_Heterog_tau2 |
|----------------------|-------|-------|---------|---------|-------------|-------------------|
| GLP1RA-Met-TZD       | 1.850 | 2.259 | 0.819   | 0.413   | (0.00,6.28) | 0.000             |
| Met-DPP4-TZD         | 1.615 | 3.230 | 0.500   | 0.617   | (0.00,7.95) | 0.000             |
| GLP1RA-Met-DPP4      | 1.566 | 2.125 | 0.737   | 0.461   | (0.00,5.73) | 0.041             |
| GLP1RA-DPP4-TZD      | 1.273 | 1.588 | 0.801   | 0.423   | (0.00,4.39) | 0.000             |
| GLP1RA-SU-DPP4       | 0.562 | 2.224 | 0.253   | 0.800   | (0.00,4.92) | 0.229             |
| GLP1RA-Insulin-TZD   | 0.196 | 2.230 | 0.088   | 0.930   | (0.00,4.57) | 0.000             |
| GLP1RA-Placebo-Blank | 0.142 | 2.125 | 0.067   | 0.947   | (0.00,4.31) | 0.028             |

| Loop  | ROR   | z_value | p_value | CI_95          | Loop_Heterog_tau2 |
|-------|-------|---------|---------|----------------|-------------------|
| A-B-G | 6.357 | 0.819   | 0.413   | (1.00,532.42)  | 0.000             |
| B-F-G | 5.030 | 0.500   | 0.617   | (1.00,2824.40) | 0.000             |
| A-B-F | 4.789 | 0.737   | 0.461   | (1.00,308.47)  | 0.041             |
| A-F-G | 3.572 | 0.801   | 0.423   | (1.00,80.34)   | 0.000             |
| A-D-F | 1.755 | 0.253   | 0.800   | (1.00,137.26)  | 0.229             |
| A-C-G | 1.217 | 0.088   | 0.930   | (1.00,96.34)   | 0.000             |
| A-H-I | 1.153 | 0.067   | 0.947   | (1.00,74.18)   | 0.028             |

node-splitting method

| Side | Direct    | Indirect  | Difference                                  |
|------|-----------|-----------|---------------------------------------------|
|      | Coef.     | Std. Err. | Coef. Std. Err. Coef. Std. Err. P> z        |
| AB * | -.4237474 | .5610843  | -3.255045 2.776536 2.831298 2.78038 0.309   |
| AC * | -2.025443 | .4087778  | .1941967 3.761243 -2.21964 3.747276 0.554   |
| AD * | -9.11e-12 | 1.264979  | -1.148454 3.322291 1.148454 3.554967 0.747  |
| AE   | .         | .         | .                                           |
| AF * | -1.439496 | .4490288  | -1.119866 2.628157 -.3196301 2.641342 0.904 |
| AG * | -1.747559 | .9147766  | -3.170195 1.622234 1.422636 1.553644 0.360  |
| AH * | -1.574695 | .1733766  | -3.331862 3.540364 1.757167 3.539859 0.620  |
| AI * | -1.452411 | .6128601  | -3.236787 3.316673 1.784376 3.319423 0.591  |
| BF   | .4107316  | 2.037319  | -1.134499 .7531303 1.54523 2.172089 0.477   |
| BG   | .4103789  | 2.036915  | -2.088349 1.198196 2.498728 2.363109 0.290  |
| CG   | .0145775  | 2.039847  | .1128567 1.115522 -.0982791 2.324937 0.966  |
| DF * | -.8979416 | 1.716675  | -2.046395 2.645225 1.148454 3.554967 0.747  |
| FG   | -1.413395 | 1.184618  | .692614 1.3176 -2.106009 1.633152 0.197     |
| HI   | 2.86e-13  | 2.065791  | .101734 .6632065 -.101734 2.169639 0.963    |

\* Warning: all the evidence about these contrasts comes from the trials which directly compare them.

Inconsistency Model

|                      |
|----------------------|
| chi2( 9) = 6.09      |
| Prob > chi2 = 0.7310 |

SUCRA

|           |          |           |       |      |        |      |          |      |      |      |
|-----------|----------|-----------|-------|------|--------|------|----------|------|------|------|
| +-----+   |          |           |       |      |        |      |          |      |      |      |
|           | Treatm~t |           | SUCRA |      | PrBest |      | MeanRank |      |      |      |
|           | -----    |           |       |      |        |      |          |      |      |      |
|           | GLP1RA   |           | 91.8  |      | 44.1   |      | 1.7      |      |      |      |
|           | Met      |           | 78.0  |      | 12.6   |      | 2.8      |      |      |      |
|           | Insulin  |           | 22.6  |      | 0.0    |      | 7.2      |      |      |      |
|           | SU       |           | 79.3  |      | 42.2   |      | 2.7      |      |      |      |
|           | SGLT2    |           | 13.4  |      | 0.0    |      | 7.9      |      |      |      |
|           | DPP4     |           | 48.0  |      | 0.0    |      | 5.2      |      |      |      |
|           | TZD      |           | 29.8  |      | 0.9    |      | 6.6      |      |      |      |
|           | Placebo  |           | 41.9  |      | 0.0    |      | 5.6      |      |      |      |
|           | Blank    |           | 45.3  |      | 0.3    |      | 5.4      |      |      |      |
| +-----+   |          |           |       |      |        |      |          |      |      |      |
| -----     |          |           |       |      |        |      |          |      |      |      |
| study and |          | Treatment |       |      |        |      |          |      |      |      |
| Rank      |          | A         | B     | C    | D      | E    | F        | G    | H    | I    |
| -----+    |          |           |       |      |        |      |          |      |      |      |
| 13        |          |           |       |      |        |      |          |      |      |      |
| Best      |          | 44.1      | 12.6  | 0.0  | 42.2   | 0.0  | 0.0      | 0.9  | 0.0  | 0.3  |
| 2nd       |          | 46.5      | 29.4  | 0.1  | 16.7   | 0.3  | 1.6      | 2.2  | 0.1  | 3.1  |
| 3rd       |          | 9.3       | 38.9  | 0.9  | 18.1   | 1.2  | 10.1     | 6.6  | 2.4  | 12.5 |
| 4th       |          | 0.2       | 11.9  | 3.9  | 7.2    | 3.4  | 26.5     | 11.9 | 12.8 | 22.3 |
| 5th       |          | 0.0       | 4.3   | 7.0  | 4.1    | 3.9  | 23.7     | 9.8  | 30.4 | 16.9 |
| 6th       |          | 0.0       | 1.7   | 13.9 | 3.3    | 6.4  | 18.0     | 9.6  | 31.9 | 15.2 |
| 7th       |          | 0.0       | 0.9   | 26.5 | 3.3    | 11.7 | 12.5     | 14.1 | 17.2 | 13.8 |
| 8th       |          | 0.0       | 0.2   | 32.7 | 2.7    | 21.9 | 6.0      | 21.0 | 4.7  | 10.8 |
| Worst     |          | 0.0       | 0.1   | 15.1 | 2.3    | 51.1 | 1.6      | 24.0 | 0.5  | 5.1  |
| -----     |          |           |       |      |        |      |          |      |      |      |

STEP2

loop inconsistency test

|                   |                               |  |       |  |       |  |         |  |         |  |             |
|-------------------|-------------------------------|--|-------|--|-------|--|---------|--|---------|--|-------------|
| +-----            |                               |  |       |  |       |  |         |  |         |  |             |
| -----+            |                               |  |       |  |       |  |         |  |         |  |             |
|                   | Loop                          |  | IF    |  | seIF  |  | z_value |  | p_value |  | CI_95       |
| Loop_Heterog_tau2 |                               |  |       |  |       |  |         |  |         |  |             |
|                   | -----+                        |  |       |  |       |  |         |  |         |  |             |
| +-----            |                               |  |       |  |       |  |         |  |         |  |             |
|                   | Liraglutide-Dulaglutide-DPP4i |  | 3.912 |  | 2.229 |  | 1.755   |  | 0.079   |  | (0.00,8.28) |
| 0.000             |                               |  |       |  |       |  |         |  |         |  |             |

|                                                                                                  |
|--------------------------------------------------------------------------------------------------|
| Exenatide-Dulaglutide-DPP4i-Placebo   2.923   1.720   1.699   0.089   (0.00,6.29)  <br>  0.000   |
| Dulaglutide-Met-Insulin-TZD   2.726   3.063   0.890   0.373   (0.00,8.73)  <br>0.000             |
| Dulaglutide-Semaglutide-Insulin-DPP4i   1.817   2.290   0.793   0.428   (0.00,6.31)  <br>  0.000 |
| Exenatide-Met-TZD   1.801   2.397   0.751   0.452   (0.00,6.50)  <br>0.000                       |
| Dulaglutide-Insulin-DPP4i-TZD   1.701   2.894   0.588   0.557   (0.00,7.37)  <br>0.000           |
| Exenatide-Dulaglutide-Insulin-DPP4i   1.685   1.898   0.888   0.375   (0.00,5.41)  <br>0.000     |
| Exenatide-Semaglutide-Insulin-Placebo   1.662   1.556   1.068   0.285   (0.00,4.71)  <br>  0.000 |
| Met-DPP4i-TZD   1.615   3.230   0.500   0.617   (0.00,7.95)  <br>0.000                           |
| Exenatide-Dulaglutide-Met-Insulin   1.609   1.512   1.064   0.287   (0.00,4.57)  <br>0.000       |
| Exenatide-Semaglutide-DPP4i-Placebo   1.530   0.911   1.680   0.093   (0.00,3.32)  <br>  0.000   |
| Liraglutide-Semaglutide-DPP4i-Placebo   1.458   1.663   0.877   0.381   (0.00,4.72)  <br>  0.104 |
| Liraglutide-Dulaglutide-Insulin   1.425   1.479   0.964   0.335   (0.00,4.32)  <br>0.000         |
| Dulaglutide-Semaglutide-DPP4i-Placebo   1.392   1.701   0.819   0.413  <br>(0.00,4.73)   0.000   |
| Exenatide-Dulaglutide-Insulin-Placebo   1.238   1.245   0.994   0.320   (0.00,3.68)  <br>0.000   |
| Exenatide-Liraglutide-Placebo   1.020   0.542   1.883   0.060   (0.00,2.08)  <br>0.050           |
| Exenatide-Liraglutide-DPP4i   0.991   1.604   0.618   0.536   (0.00,4.14)  <br>0.000             |
| Liraglutide-Met-DPP4i   0.921   2.934   0.314   0.754   (0.00,6.67)  <br>0.000                   |
| Liraglutide-Semaglutide-Insulin-Placebo   0.885   1.672   0.529   0.597   (0.00,4.16)  <br>0.044 |
| Liraglutide-Met-Insulin-TZD   0.874   3.340   0.262   0.794   (0.00,7.42)  <br>0.000             |
| Liraglutide-Dulaglutide-Placebo   0.873   1.170   0.746   0.456   (0.00,3.17)  <br>0.005         |
| Liraglutide-Insulin-DPP4i-TZD   0.785   2.846   0.276   0.783   (0.00,6.36)  <br>0.000           |
| Liraglutide-Semaglutide-Insulin-DPP4i   0.670   2.230   0.300   0.764   (0.00,5.04)  <br>0.000   |
| Exenatide-DPP4i-TZD   0.549   1.899   0.289   0.772   (0.00,4.27)  <br>0.000                     |
| Exenatide-SU-DPP4i   0.457   2.180   0.210   0.834   (0.00,4.73)  <br>0.000                      |

|                   |  |                                                                                       |       |
|-------------------|--|---------------------------------------------------------------------------------------|-------|
| 0.000             |  | Exenatide-Insulin-TZD   0.455   2.280   0.200   0.842   (0.00,4.92)                   | 0.000 |
| 0.000             |  | Liraglutide-Dulaglutide-Met   0.428   2.006   0.213   0.831   (0.00,4.36)             | 0.000 |
| 0.000             |  | Dulaglutide-Semaglutide-Insulin-Placebo   0.424   1.806   0.235   0.814   (0.00,3.96) | 0.000 |
| 0.000             |  | Exenatide-Dulaglutide-Met-Placebo   0.371   1.281   0.290   0.772   (0.00,2.88)       | 0.000 |
| 0.000             |  | Exenatide-Liraglutide-Insulin   0.190   1.008   0.188   0.851   (0.00,2.16)           | 0.000 |
| 0.000             |  | Exenatide-Semaglutide-Insulin-DPP4i   0.132   1.772   0.074   0.941   (0.00,3.61)     | 0.000 |
| 0.000             |  | Semaglutide-Insulin-DPP4i-TZD   0.116   2.813   0.041   0.967   (0.00,5.63)           | 0.000 |
| 0.005             |  | Exenatide-Placebo-Blank   0.111   2.121   0.052   0.958   (0.00,4.27)                 | 0.005 |
| 0.000             |  | Exenatide-Met-DPP4i   0.092   2.261   0.041   0.968   (0.00,4.52)                     | 0.000 |
| 0.000             |  | Exenatide-Liraglutide-Met   0.054   1.817   0.030   0.976   (0.00,3.62)               | 0.000 |
| +-----+<br>-----+ |  |                                                                                       |       |

| +-----+ |        |         |         |                |                   |  |
|---------|--------|---------|---------|----------------|-------------------|--|
| Loop    | ROR    | z_value | p_value | CI_95          | Loop_Heterog_tau2 |  |
| +-----+ |        |         |         |                |                   |  |
| B-C-K   | 49.984 | 1.755   | 0.079   | (1.00,3942.84) | 0.000             |  |
| C-G-K   | 30.533 | 1.322   | 0.186   | (1.00,4846.28) | 0.000             |  |
| A-C-K-M | 18.590 | 1.699   | 0.089   | (1.00,540.90)  | 0.000             |  |
| C-G-H-L | 15.278 | 0.890   | 0.373   | (1.00,6185.99) | 0.000             |  |
| C-D-H-K | 6.153  | 0.793   | 0.428   | (1.00,547.70)  | 0.000             |  |
| A-G-L   | 6.058  | 0.751   | 0.452   | (1.00,664.92)  | 0.000             |  |
| C-H-K-L | 5.481  | 0.588   | 0.557   | (1.00,1593.04) | 0.000             |  |
| A-C-H-K | 5.393  | 0.888   | 0.375   | (1.00,222.69)  | 0.000             |  |
| A-D-H-M | 5.270  | 1.068   | 0.285   | (1.00,111.14)  | 0.000             |  |
| G-K-L   | 5.030  | 0.500   | 0.617   | (1.00,2824.34) | 0.000             |  |
| A-C-G-H | 4.998  | 1.064   | 0.287   | (1.00,96.81)   | 0.000             |  |
| A-D-K-M | 4.619  | 1.680   | 0.093   | (1.00,27.54)   | 0.000             |  |
| B-D-K-M | 4.298  | 0.877   | 0.381   | (1.00,111.94)  | 0.104             |  |
| B-C-H   | 4.157  | 0.964   | 0.335   | (1.00,75.43)   | 0.000             |  |
| C-D-K-M | 4.025  | 0.819   | 0.413   | (1.00,112.85)  | 0.000             |  |
| A-C-H-M | 3.447  | 0.994   | 0.320   | (1.00,39.52)   | 0.000             |  |
| A-B-M   | 2.774  | 1.883   | 0.060   | (1.00,8.02)    | 0.050             |  |
| A-B-K   | 2.695  | 0.618   | 0.536   | (1.00,62.49)   | 0.000             |  |
| B-G-K   | 2.511  | 0.314   | 0.754   | (1.00,788.80)  | 0.000             |  |

|                                                          |
|----------------------------------------------------------|
| B-D-H-M   2.422   0.529   0.597   (1.00,64.14)   0.044   |
| B-G-H-L   2.396   0.262   0.794   (1.00,1670.04)   0.000 |
| B-C-M   2.393   0.746   0.456   (1.00,23.70)   0.005     |
| B-H-K-L   2.193   0.276   0.783   (1.00,580.66)   0.000  |
| B-D-H-K   1.954   0.300   0.764   (1.00,154.50)   0.000  |
| A-K-L   1.732   0.289   0.772   (1.00,71.59)   0.000     |
| A-I-K   1.580   0.210   0.834   (1.00,113.28)   0.000    |
| A-H-L   1.577   0.200   0.842   (1.00,137.66)   0.000    |
| B-C-G   1.534   0.213   0.831   (1.00,78.15)   0.000     |
| C-D-H-M   1.529   0.235   0.814   (1.00,52.62)   0.000   |
| A-C-G-M   1.450   0.290   0.772   (1.00,17.84)   0.000   |
| A-B-H   1.209   0.188   0.851   (1.00,8.71)   0.000      |
| A-D-H-K   1.141   0.074   0.941   (1.00,36.80)   0.000   |
| D-H-K-L   1.122   0.041   0.967   (1.00,278.30)   0.000  |
| A-M-N   1.117   0.052   0.958   (1.00,71.38)   0.005     |
| A-G-K   1.096   0.041   0.968   (1.00,92.08)   0.000     |
| A-B-G   1.055   0.030   0.976   (1.00,37.19)   0.000     |
| +-----+                                                  |

node-splitting method

| Side  | Direct    | Indirect  |           | Difference |           |           |       |
|-------|-----------|-----------|-----------|------------|-----------|-----------|-------|
|       | Coef.     | Std. Err. | Coef.     | Std. Err.  | Coef.     | Std. Err. | P> z  |
| A B   | 1.183487  | .423013   | .3442286  | .3773265   | .8392586  | .5633891  | 0.136 |
| A F   | .         | .         | .         | .          | .         | .         | .     |
| A G   | -.7040413 | .8072199  | -.5045074 | .8179191   | -.1995339 | 1.126351  | 0.859 |
| A H   | -1.604549 | .5903014  | -2.160989 | .6040188   | .5564398  | .8351691  | 0.505 |
| A I * | 3.08e-10  | 1.244699  | -.5960247 | 3.308097   | .5960247  | 3.534513  | 0.866 |
| A K * | -.5299589 | .6644503  | -1.717559 | .6020594   | 1.1876    | .8898376  | 0.182 |
| A L * | -1.75214  | .9069505  | -2.788724 | 1.642966   | 1.036584  | 1.57048   | 0.509 |
| A M   | -1.472637 | .2464666  | -.4663911 | .4484715   | -1.006246 | .5203232  | 0.053 |
| A N * | -1.555421 | .6041542  | -1.49557  | 3.312354   | -.0598501 | 3.316434  | 0.986 |
| B C   | -1.950359 | .9704285  | -.9763099 | .5502653   | -.9740494 | 1.108213  | 0.379 |
| B G   | -2.032153 | 1.634438  | -1.185297 | .6578561   | -.846856  | 1.761852  | 0.631 |
| B H   | -2.491118 | .7718886  | -2.615243 | .5491952   | .1241251  | .9463774  | 0.896 |
| B K   | -.6931404 | 1.451732  | -2.03505  | .5314818   | 1.34191   | 1.545957  | 0.385 |
| B M   | -1.66771  | .3521489  | -2.461433 | .4804096   | .7937222  | .6070325  | 0.191 |
| C G   | .4148294  | .828465   | -.6615253 | .8747227   | 1.076355  | 1.204776  | 0.372 |
| C H   | -1.912641 | .904379   | -1.066344 | .6685111   | -.8462963 | 1.124371  | 0.452 |
| C K   | -2.585267 | 1.477088  | -.2909707 | .6554469   | -2.294297 | 1.615982  | 0.156 |
| C M   | -.52243   | .6588761  | -.9326053 | .6594215   | .4101753  | .9572767  | 0.668 |
| D H   | -3.468832 | 1.458123  | -2.3981   | .5297036   | -1.070732 | 1.551354  | 0.490 |
| D J * | -2.466712 | .6789759  | -3.758701 | 199.9245   | 1.291989  | 199.9238  | 0.995 |
| D K   | -2.329909 | .6574917  | -1.337494 | .6436675   | -.992415  | .9201084  | 0.281 |
| D M   | -1.769405 | .2488008  | -2.856996 | .7697442   | 1.087591  | .8098771  | 0.179 |
| E M * | -1.722973 | 1.078311  | -.7541222 | 200.019    | -.9688509 | 200.0272  | 0.996 |
| G K   | .4188531  | 2.025338  | -.7097333 | .7586362   | 1.128586  | 2.162784  | 0.602 |

|      |           |          |           |          |           |          |       |
|------|-----------|----------|-----------|----------|-----------|----------|-------|
| GL   | .4184009  | 2.024964 | -1.871448 | 1.203848 | 2.289849  | 2.355702 | 0.331 |
| HL   | .0145825  | 2.027049 | -.0051992 | 1.111525 | .0197816  | 2.311792 | 0.993 |
| IK * | -.8979416 | 1.701786 | -1.493966 | 2.627375 | .5960244  | 3.534513 | 0.866 |
| KL   | -1.389407 | 1.174132 | .2252102  | 1.330093 | -1.614617 | 1.637627 | 0.324 |
| MN   | 6.37e-10  | 2.053226 | -.3497045 | .6675124 | .3497045  | 2.159007 | 0.871 |

\* Warning: all the evidence about these contrasts comes from the trials which directly compare them.

### Inconsistency Model

|                      |
|----------------------|
| chi2( 22) = 11.88    |
| Prob > chi2 = 0.9598 |

### SUCRA

| Treatment    | SUCRA | PrBest | MeanRank |
|--------------|-------|--------|----------|
| Exenatide    | 66.3  | 0.0    | 5.4      |
| Liraglutide  | 87.7  | 18.5   | 2.6      |
| Dulaglutide  | 52.7  | 0.1    | 7.1      |
| Semaglutide  | 85.8  | 14.8   | 2.8      |
| Tirzepatide  | 76.4  | 31.5   | 4.1      |
| Taspoglutide | 85.4  | 18.5   | 2.9      |
| Met          | 50.0  | 0.4    | 7.5      |
| Insulin      | 12.4  | 0.0    | 12.4     |
| SU           | 63.4  | 16.3   | 5.8      |
| SGLT2i       | 16.7  | 0.0    | 11.8     |
| DPP4i        | 32.8  | 0.0    | 9.7      |
| TZD          | 17.2  | 0.1    | 11.8     |
| Placebo      | 30.9  | 0.0    | 10.0     |
| Blank        | 22.4  | 0.0    | 11.1     |

| study and Rank | A    | B    | C    | D    | E    | F    | G    | H   | I    | J   | K    | L   | M   | N   |
|----------------|------|------|------|------|------|------|------|-----|------|-----|------|-----|-----|-----|
| 13             |      |      |      |      |      |      |      |     |      |     |      |     |     |     |
| Best           | 0.0  | 18.5 | 0.1  | 14.8 | 31.5 | 18.5 | 0.4  | 0.0 | 16.3 | 0.0 | 0.0  | 0.1 | 0.0 | 0.0 |
| 2nd            | 0.1  | 30.8 | 0.2  | 26.6 | 10.1 | 23.4 | 0.6  | 0.0 | 8.1  | 0.0 | 0.0  | 0.1 | 0.0 | 0.0 |
| 3rd            | 1.2  | 28.4 | 0.8  | 29.1 | 8.0  | 24.2 | 1.6  | 0.0 | 6.2  | 0.1 | 0.0  | 0.2 | 0.0 | 0.1 |
| 4th            | 15.0 | 16.9 | 2.7  | 20.5 | 10.5 | 21.5 | 3.6  | 0.0 | 8.5  | 0.1 | 0.1  | 0.5 | 0.0 | 0.1 |
| 5th            | 40.0 | 4.9  | 8.2  | 7.5  | 9.8  | 9.2  | 7.7  | 0.0 | 10.4 | 0.5 | 0.5  | 0.9 | 0.0 | 0.5 |
| 6th            | 33.0 | 0.4  | 19.9 | 1.2  | 9.0  | 2.3  | 15.7 | 0.0 | 10.8 | 1.4 | 2.2  | 2.1 | 0.2 | 1.7 |
| 7th            | 9.1  | 0.1  | 30.2 | 0.3  | 7.1  | 0.6  | 23.6 | 0.3 | 9.6  | 2.7 | 7.2  | 3.4 | 1.8 | 4.1 |
| 8th            | 1.6  | 0.0  | 22.8 | 0.1  | 5.0  | 0.2  | 20.1 | 1.0 | 9.0  | 4.5 | 14.6 | 5.2 | 9.0 | 7.1 |

|       |     |     |     |     |     |     |      |      |     |      |      |      |      |      |
|-------|-----|-----|-----|-----|-----|-----|------|------|-----|------|------|------|------|------|
| 9th   | 0.1 | 0.0 | 8.8 | 0.0 | 2.8 | 0.0 | 10.8 | 2.8  | 5.5 | 7.0  | 21.5 | 6.8  | 24.0 | 10.1 |
| 10th  | 0.0 | 0.0 | 3.7 | 0.0 | 2.0 | 0.0 | 7.0  | 5.4  | 3.8 | 7.7  | 20.8 | 7.1  | 31.2 | 11.2 |
| 11th  | 0.0 | 0.0 | 1.6 | 0.0 | 1.4 | 0.0 | 4.4  | 12.6 | 3.4 | 11.7 | 16.3 | 9.6  | 23.3 | 15.8 |
| 12th  | 0.0 | 0.0 | 0.8 | 0.0 | 1.5 | 0.0 | 2.7  | 24.0 | 3.4 | 15.9 | 10.7 | 12.7 | 8.8  | 19.5 |
| 13th  | 0.0 | 0.0 | 0.2 | 0.0 | 0.9 | 0.0 | 1.3  | 32.2 | 2.5 | 20.7 | 5.0  | 18.0 | 1.7  | 17.5 |
| Worst | 0.0 | 0.0 | 0.0 | 0.0 | 0.5 | 0.0 | 0.4  | 21.7 | 2.7 | 27.8 | 1.2  | 33.4 | 0.1  | 12.2 |
| ----- |     |     |     |     |     |     |      |      |     |      |      |      |      |      |

STEP3

loop inconsistency test

| +-----+                              |                                               |       |       |         |         |             |  |  |  |  |  |  |  |  |
|--------------------------------------|-----------------------------------------------|-------|-------|---------|---------|-------------|--|--|--|--|--|--|--|--|
| -----+                               |                                               |       |       |         |         |             |  |  |  |  |  |  |  |  |
|                                      | Loop                                          | IF    | seIF  | z_value | p_value | CI_95       |  |  |  |  |  |  |  |  |
| Loop_Heterog_tau2                    |                                               |       |       |         |         |             |  |  |  |  |  |  |  |  |
| +-----+-----+-----+-----+-----+----- |                                               |       |       |         |         |             |  |  |  |  |  |  |  |  |
| +-----                               |                                               |       |       |         |         |             |  |  |  |  |  |  |  |  |
|                                      | Efpeglenatide qm-Placebo-Liraglutide          | 2.803 | 2.822 | 0.993   | 0.321   |             |  |  |  |  |  |  |  |  |
| (0.00,8.33)                          |                                               | 0.000 |       |         |         |             |  |  |  |  |  |  |  |  |
|                                      | Exenatide bid-Met-TZD                         | 2.417 | 2.633 | 0.918   | 0.359   | (0.00,7.58) |  |  |  |  |  |  |  |  |
| 0.000                                |                                               |       |       |         |         |             |  |  |  |  |  |  |  |  |
|                                      | Exenatide bid-Exenatide qw-TZD-Placebo        | 2.161 | 2.269 | 0.952   | 0.341   |             |  |  |  |  |  |  |  |  |
| (0.00,6.61)                          |                                               | 0.583 |       |         |         |             |  |  |  |  |  |  |  |  |
|                                      | Exenatide qw-Placebo-Blank                    | 2.116 | 2.505 | 0.845   | 0.398   | (0.00,7.03) |  |  |  |  |  |  |  |  |
| 0.000                                |                                               |       |       |         |         |             |  |  |  |  |  |  |  |  |
|                                      | Exenatide qw-Semaglutide qw-DPP4i-Placebo     | 2.080 | 1.331 | 1.563   | 0.118   |             |  |  |  |  |  |  |  |  |
| (0.00,4.69)                          |                                               | 0.000 |       |         |         |             |  |  |  |  |  |  |  |  |
|                                      | Exenatide bid-Lixisenatide-Insulin-Placebo    | 1.921 | 1.938 | 0.991   | 0.322   |             |  |  |  |  |  |  |  |  |
| (0.00,5.72)                          |                                               | 0.000 |       |         |         |             |  |  |  |  |  |  |  |  |
|                                      | Exenatide qw-Placebo-Liraglutide              | 1.919 | 1.320 | 1.454   | 0.146   |             |  |  |  |  |  |  |  |  |
| (0.00,4.51)                          |                                               | 0.000 |       |         |         |             |  |  |  |  |  |  |  |  |
|                                      | Exenatide bid-Exenatide qw-Insulin-Placebo    | 1.719 | 1.444 | 1.190   | 0.234   |             |  |  |  |  |  |  |  |  |
| (0.00,4.55)                          |                                               | 0.312 |       |         |         |             |  |  |  |  |  |  |  |  |
|                                      | Exenatide bid-Exenatide qw-Met-Blank          | 1.547 | 2.885 | 0.536   | 0.592   |             |  |  |  |  |  |  |  |  |
| (0.00,7.20)                          |                                               | 0.000 |       |         |         |             |  |  |  |  |  |  |  |  |
|                                      | Efpeglenatide qw-Efpeglenatide qm-Liraglutide | 1.480 | 2.466 | 0.600   | 0.548   |             |  |  |  |  |  |  |  |  |
| (0.00,6.31)                          |                                               | 0.000 |       |         |         |             |  |  |  |  |  |  |  |  |
|                                      | Lixisenatide-Semaglutide qw-DPP4i-Placebo     | 1.463 | 1.239 | 1.181   | 0.238   |             |  |  |  |  |  |  |  |  |
| (0.00,3.89)                          |                                               | 0.000 |       |         |         |             |  |  |  |  |  |  |  |  |
|                                      | Exenatide bid-Exenatide qw-Met-Insulin        | 1.391 | 2.152 | 0.646   | 0.518   |             |  |  |  |  |  |  |  |  |
| (0.00,5.61)                          |                                               | 0.000 |       |         |         |             |  |  |  |  |  |  |  |  |
|                                      | Efpeglenatide qw-Efpeglenatide qm-Placebo     | 1.323 | 2.811 | 0.471   | 0.638   |             |  |  |  |  |  |  |  |  |
| (0.00,6.83)                          |                                               | 0.000 |       |         |         |             |  |  |  |  |  |  |  |  |
|                                      | Exenatide bid-Exenatide qw-DPP4i-Placebo      | 1.322 | 2.272 | 0.582   | 0.560   |             |  |  |  |  |  |  |  |  |
| (0.00,5.77)                          |                                               | 0.559 |       |         |         |             |  |  |  |  |  |  |  |  |
|                                      | Lixisenatide-Placebo-Blank                    | 1.188 | 2.638 | 0.451   | 0.652   | (0.00,6.36) |  |  |  |  |  |  |  |  |
| 0.000                                |                                               |       |       |         |         |             |  |  |  |  |  |  |  |  |

|                   |                                            |       |       |       |       |             |       |
|-------------------|--------------------------------------------|-------|-------|-------|-------|-------------|-------|
|                   | Exenatide bid-Insulin-TZD                  | 1.130 | 2.647 | 0.427 | 0.669 | (0.00,6.32) |       |
| 0.000             |                                            |       |       |       |       |             |       |
|                   | Exenatide bid-Lixisenatide-DPP4i-Placebo   | 1.046 | 1.890 | 0.553 | 0.580 |             |       |
| (0.00,4.75)       |                                            | 0.052 |       |       |       |             |       |
|                   | Exenatide qw-Met-TZD                       | 0.907 | 3.016 | 0.301 | 0.764 | (0.00,6.82) |       |
| 0.000             |                                            |       |       |       |       |             |       |
|                   | Exenatide bid-DPP4i-TZD                    | 0.809 | 2.541 | 0.318 | 0.750 | (0.00,5.79) |       |
| 0.000             |                                            |       |       |       |       |             |       |
|                   | Lixisenatide-Insulin-DPP4i-TZD             | 0.806 | 2.844 | 0.283 | 0.777 |             |       |
| (0.00,6.38)       |                                            | 0.000 |       |       |       |             |       |
|                   | Lixisenatide-Efpeglenatide qw-Placebo      | 0.804 | 2.074 | 0.388 | 0.698 |             |       |
| (0.00,4.87)       |                                            | 0.000 |       |       |       |             |       |
|                   | Exenatide bid-Lixisenatide-Insulin-DPP4i   | 0.803 | 2.444 | 0.328 | 0.743 |             |       |
| (0.00,5.59)       |                                            | 0.000 |       |       |       |             |       |
|                   | Exenatide bid-Lixisenatide-Insulin-Blank   | 0.709 | 2.888 | 0.245 | 0.806 |             |       |
| (0.00,6.37)       |                                            | 0.000 |       |       |       |             |       |
|                   | Exenatide qw-Met-DPP4i                     | 0.708 | 2.738 | 0.259 | 0.796 | (0.00,6.07) |       |
| 0.000             |                                            |       |       |       |       |             |       |
|                   | Exenatide qw-Lixisenatide-DPP4i-Placebo    | 0.618 | 1.072 | 0.576 | 0.564 |             |       |
| (0.00,2.72)       |                                            | 0.000 |       |       |       |             |       |
|                   | Exenatide bid-Met-DPP4i                    | 0.600 | 2.754 | 0.218 | 0.828 | (0.00,6.00) |       |
| 0.000             |                                            |       |       |       |       |             |       |
|                   | Exenatide qw-Lixisenatide-Insulin-DPP4i    | 0.554 | 1.941 | 0.286 | 0.775 |             |       |
| (0.00,4.36)       |                                            | 0.000 |       |       |       |             |       |
|                   | Exenatide bid-Semaglutide qw-DPP4i-Placebo | 0.530 | 2.606 | 0.203 | 0.839 |             |       |
| (0.00,5.64)       |                                            | 1.002 |       |       |       |             |       |
|                   | Efpeglenatide qw-Placebo-Liraglutide       | .     | .     | .     | .     |             |       |
| 0.000             |                                            |       |       |       |       |             |       |
|                   | Exenatide bid-Placebo-Blank                | 0.350 | 3.243 | 0.108 | 0.914 | (0.00,6.71) |       |
| 1.540             |                                            |       |       |       |       |             |       |
|                   | Exenatide qw-Insulin-TZD                   | 0.263 | 2.421 | 0.109 | 0.913 | (0.00,5.01) |       |
| 0.000             |                                            |       |       |       |       |             |       |
|                   | Exenatide bid-Exenatide qw-Insulin-DPP4i   | 0.248 | 2.146 | 0.116 | 0.908 |             |       |
| (0.00,4.46)       |                                            | 0.000 |       |       |       |             |       |
|                   | Exenatide bid-Exenatide qw-Insulin-Blank   | 0.156 | 2.461 | 0.063 | 0.949 |             |       |
| (0.00,4.98)       |                                            | 0.000 |       |       |       |             |       |
|                   | Exenatide bid-Exenatide qw-Met-Placebo     | 0.141 | 2.477 | 0.057 | 0.955 |             |       |
| (0.00,5.00)       |                                            | 0.814 |       |       |       |             |       |
|                   | Exenatide qw-Lixisenatide-Insulin-Placebo  | 0.063 | 1.898 | 0.033 | 0.973 |             |       |
| (0.00,3.78)       |                                            | 0.000 |       |       |       |             |       |
|                   | Exenatide qw-DPP4i-TZD                     | .     | .     | .     | .     |             | 0.000 |
|                   |                                            |       |       |       |       |             |       |
|                   | Exenatide bid-SU-DPP4i                     | .     | .     | .     | .     |             | 0.000 |
|                   |                                            |       |       |       |       |             |       |
| +-----+<br>-----+ |                                            |       |       |       |       |             |       |



\*\*\* Note: Loop Exenatide bid-SU-DPP4i is formed only by multi-arm trial(s) - Consistent by definition

\*\*\* Note: Loop Exenatide qw-DPP4i-TZD is formed only by multi-arm trial(s) - Consistent by definition

\*\*\* Note: Loop Efpeglenatide qw-Placebo-Liraglutide is formed only by multi-arm trial(s) - Consistent by definition

| +-----+ |        |         |         |                |                   |  |
|---------|--------|---------|---------|----------------|-------------------|--|
| Loop    | ROR    | z_value | p_value | CI_95          | Loop_Heterog_tau2 |  |
| +-----+ |        |         |         |                |                   |  |
| H-Q-S   | 16.493 | 0.993   | 0.321   | (1.00,4164.39) | 0.000             |  |
| B-K-P   | 11.216 | 0.918   | 0.359   | (1.00,1953.89) | 0.000             |  |
| B-C-P-Q | 8.676  | 0.952   | 0.341   | (1.00,741.35)  | 0.583             |  |
| C-I-O-Q | 8.008  | 1.563   | 0.118   | (1.00,108.72)  | 0.000             |  |
| B-F-L-Q | 6.830  | 0.991   | 0.322   | (1.00,304.98)  | 0.000             |  |
| C-Q-S   | 6.812  | 1.454   | 0.146   | (1.00,90.49)   | 0.000             |  |
| B-C-L-Q | 5.580  | 1.190   | 0.234   | (1.00,94.64)   | 0.312             |  |
| K-O-P   | 5.030  | 0.500   | 0.617   | (1.00,2824.34) | 0.000             |  |
| B-C-K-R | 4.698  | 0.536   | 0.592   | (1.00,1341.64) | 0.000             |  |
| G-H-S   | 4.393  | 0.600   | 0.548   | (1.00,552.04)  | 0.000             |  |
| F-I-O-Q | 4.317  | 1.181   | 0.238   | (1.00,48.94)   | 0.000             |  |
| B-C-K-L | 4.020  | 0.646   | 0.518   | (1.00,272.90)  | 0.000             |  |
| G-H-Q   | 3.754  | 0.471   | 0.638   | (1.00,926.62)  | 0.000             |  |
| B-C-O-Q | 3.753  | 0.582   | 0.560   | (1.00,322.07)  | 0.559             |  |
| F-Q-R   | 3.282  | 0.451   | 0.652   | (1.00,576.96)  | 0.000             |  |
| B-L-P   | 3.096  | 0.427   | 0.669   | (1.00,554.28)  | 0.000             |  |
| B-F-O-Q | 2.845  | 0.553   | 0.580   | (1.00,115.70)  | 0.052             |  |
| C-K-P   | 2.478  | 0.301   | 0.764   | (1.00,914.98)  | 0.000             |  |
| B-O-P   | 2.245  | 0.318   | 0.750   | (1.00,326.51)  | 0.000             |  |
| F-L-O-P | 2.239  | 0.283   | 0.777   | (1.00,589.84)  | 0.000             |  |
| F-G-Q   | 2.234  | 0.388   | 0.698   | (1.00,130.17)  | 0.000             |  |
| B-F-L-O | 2.231  | 0.328   | 0.743   | (1.00,268.47)  | 0.000             |  |
| B-F-L-R | 2.032  | 0.245   | 0.806   | (1.00,584.07)  | 0.000             |  |
| C-K-O   | 2.030  | 0.259   | 0.796   | (1.00,434.64)  | 0.000             |  |
| C-F-O-Q | 1.855  | 0.576   | 0.564   | (1.00,15.16)   | 0.000             |  |
| B-K-O   | 1.822  | 0.218   | 0.828   | (1.00,402.55)  | 0.000             |  |
| C-F-L-O | 1.741  | 0.286   | 0.775   | (1.00,78.18)   | 0.000             |  |
| B-I-O-Q | 1.699  | 0.203   | 0.839   | (1.00,280.73)  | 1.002             |  |
| G-Q-S   | .      | .       | .       | 0.000          |                   |  |
| B-Q-R   | 1.419  | 0.108   | 0.914   | (1.00,816.75)  | 1.540             |  |
| C-L-P   | 1.301  | 0.109   | 0.913   | (1.00,149.62)  | 0.000             |  |
| B-C-L-O | 1.282  | 0.116   | 0.908   | (1.00,86.06)   | 0.000             |  |
| B-C-L-R | 1.169  | 0.063   | 0.949   | (1.00,145.48)  | 0.000             |  |
| B-C-K-Q | 1.152  | 0.057   | 0.955   | (1.00,147.95)  | 0.814             |  |

|                                                                                      |       |       |       |              |       |
|--------------------------------------------------------------------------------------|-------|-------|-------|--------------|-------|
| C-F-L-Q                                                                              | 1.065 | 0.033 | 0.973 | (1.00,44.00) | 0.000 |
| C-O-P                                                                                | .     | .     | .     |              | 0.000 |
| B-M-O                                                                                | .     | .     | .     |              | 0.000 |
| +-----+                                                                              |       |       |       |              |       |
| *** Note: Loop B-M-O is formed only by multi-arm trial(s) - Consistent by definition |       |       |       |              |       |
| *** Note: Loop C-O-P is formed only by multi-arm trial(s) - Consistent by definition |       |       |       |              |       |
| *** Note: Loop G-Q-S is formed only by multi-arm trial(s) - Consistent by definition |       |       |       |              |       |

node-splitting method

| Side  | Direct    |           | Indirect  |           | Difference |           | P> z  |
|-------|-----------|-----------|-----------|-----------|------------|-----------|-------|
|       | Coef.     | Std. Err. | Coef.     | Std. Err. | Coef.      | Std. Err. |       |
| A B * | -.6340232 | .5357435  | -.3114992 | 16.0155   | -.322524   | 16.02446  | 0.984 |
| B K   | -.7167163 | 1.023365  | -1.449214 | 1.706989  | .7324975   | 1.99022   | 0.713 |
| B L   | -2.001274 | .8058184  | -.5124432 | .9621489  | -1.488831  | 1.244817  | 0.232 |
| B M * | -.0000261 | 1.308975  | .5495031  | 3.514504  | -.5495292  | 3.750237  | 0.884 |
| B O * | -.8980111 | 1.749308  | -.6232881 | .675976   | -.274723   | 1.875355  | 0.884 |
| B P   | -2.957835 | 1.44999   | -1.017523 | 1.183823  | -1.940312  | 1.787782  | 0.278 |
| B Q   | -1.241566 | .493787   | -2.482947 | .8703459  | 1.241381   | 1.03252   | 0.229 |
| B R   | -.9985178 | 1.708203  | -.4638434 | 1.194822  | -.5346744  | 2.026643  | 0.792 |
| C K   | -.8866376 | 1.662571  | -.7654319 | 1.138681  | -.1212057  | 1.945252  | 0.950 |
| C L   | -.9435854 | .8482679  | -1.73223  | .9444197  | .7886441   | 1.276378  | 0.537 |
| C O   | -.1325979 | .8761458  | -.8490549 | .7300753  | .716457    | 1.139731  | 0.530 |
| C P   | -1.178432 | 1.133877  | -2.501222 | 1.393776  | 1.32279    | 1.639103  | 0.420 |
| C Q   | -2.098118 | .3555121  | -.59456   | .6043105  | -1.503558  | .7044692  | 0.033 |
| C R   | -.0001178 | 1.527214  | -.8986207 | 1.267742  | .8985029   | 1.984801  | 0.651 |
| C S   | 1.155241  | .6586116  | .0405092  | 1.171315  | 1.114732   | 1.343778  | 0.407 |
| D Q * | -.5378543 | 1.660396  | -3.851998 | 200.0159  | 3.314143   | 200.0353  | 0.987 |
| E Q * | -3.157113 | 1.516988  | -1.232481 | 200.0218  | -1.924632  | 200.0378  | 0.992 |
| F G   | -1.609399 | 1.642794  | -1.701513 | 1.037516  | .0921136   | 1.94297   | 0.962 |
| F L   | -1.67613  | 1.673941  | -2.570489 | .8174109  | .8943586   | 1.862855  | 0.631 |
| F O   | -1.600195 | .5159722  | -1.861098 | .8964719  | .2609025   | 1.031381  | 0.800 |
| F Q   | -2.815818 | .6918423  | -2.285657 | .7170963  | -.5301616  | .9964196  | 0.595 |
| F R   | -1.628028 | 1.635482  | -1.632988 | 1.247891  | .0049591   | 2.05716   | 0.998 |
| G H * | 1.175315  | 1.755344  | 1.326676  | 3.118581  | -.1513602  | 3.931901  | 0.969 |
| G Q * | -.3312742 | 1.182909  | -1.64135  | 1.40702   | 1.310075   | 2.001282  | 0.513 |
| G S * | 1.276327  | .7760029  | 2.311481  | 1.731799  | -1.035154  | 1.892504  | 0.584 |
| H Q * | -.7129498 | 1.756144  | -5.510617 | 3.059264  | 4.797667   | 3.896806  | 0.218 |
| H S * | -1.175573 | 1.745696  | 3.519158  | 2.959556  | -4.694731  | 3.802794  | 0.217 |
| I O   | -2.329916 | .761136   | -1.111402 | 1.098145  | -1.218514  | 1.336136  | 0.362 |
| I Q   | -2.259938 | .919647   | -3.478336 | .9638049  | 1.218398   | 1.336178  | 0.362 |
| J N * | -2.466712 | .7862955  | -1.033961 | 200.1146  | -1.432752  | 200.1143  | 0.994 |
| J Q * | -1.478493 | .5464064  | -2.33815  | 89.44131  | .8596571   | 89.44309  | 0.992 |
| K O   | .4189452  | 2.067184  | .1968963  | 1.159232  | .2220489   | 2.370138  | 0.925 |

|       |           |          |           |          |           |          |       |
|-------|-----------|----------|-----------|----------|-----------|----------|-------|
| K P   | .4183904  | 2.066924 | -1.564209 | 1.522394 | 1.982599  | 2.56708  | 0.440 |
| L P   | .0145893  | 2.066841 | -.5150149 | 1.235075 | .5296042  | 2.40774  | 0.826 |
| M O * | -.8979416 | 1.749364 | -.3486747 | 2.883577 | -.5492669 | 3.750853 | 0.884 |
| O P   | -1.209271 | 1.23319  | -.9810498 | 1.45978  | -.228221  | 1.801052 | 0.899 |
| Q R   | -8.20e-10 | 2.091192 | 1.187961  | 1.100193 | -1.187961 | 2.362945 | 0.615 |
| Q S * | 1.409557  | 1.212485 | 2.77129   | .7926605 | -1.361732 | 1.465503 | 0.353 |

\* Warning: all the evidence about these contrasts comes from the trials which directly compare them.

#### Inconsistency Model

|                      |
|----------------------|
| chi2( 17) = 5.86     |
| Prob > chi2 = 0.9941 |

#### SUCRA

| Treatment        | SUCRA | PrBest | MeanRank |
|------------------|-------|--------|----------|
| Taspoglutide     | 74.1  | 4.4    | 5.7      |
| Exenatide bid    | 57.3  | 0.0    | 8.7      |
| Exenatide qw     | 54.9  | 0.0    | 9.1      |
| PEX168           | 35.8  | 3.3    | 12.6     |
| ITCA650          | 83.8  | 43.5   | 3.9      |
| Lixisenatide     | 83.2  | 5.5    | 4.0      |
| Efpeglenatide qw | 39.4  | 0.0    | 11.9     |
| Efpeglenatide qm | 68.4  | 13.6   | 6.7      |
| Semaglutide qw   | 87.1  | 17.4   | 3.3      |
| oral Semaglutide | 55.3  | 0.2    | 9.0      |
| Met              | 33.8  | 0.1    | 12.9     |
| Insulin          | 20.8  | 0.0    | 15.3     |
| SU               | 58.0  | 6.3    | 8.6      |
| SGLT2i           | 6.9   | 0.0    | 17.8     |
| DPP4i            | 38.8  | 0.0    | 12.0     |
| TZD              | 16.5  | 0.0    | 16.0     |
| Placebo          | 16.5  | 0.0    | 16.0     |
| Blank            | 41.3  | 0.5    | 11.6     |
| Liraglutide      | 78.1  | 5.2    | 4.9      |

| study and | Treatment |   |   |   |   |   |   |   |   |   |   |   |   |   |   |   |   |
|-----------|-----------|---|---|---|---|---|---|---|---|---|---|---|---|---|---|---|---|
| Rank      | A         | B | C | D | E | F | G | H | I | J | K | L | M | N | O | P | Q |
| R         | S         |   |   |   |   |   |   |   |   |   |   |   |   |   |   |   |   |

|       |  |      |      |      |      |      |      |      |      |      |      |      |      |     |      |      |      |  |
|-------|--|------|------|------|------|------|------|------|------|------|------|------|------|-----|------|------|------|--|
| 15    |  |      |      |      |      |      |      |      |      |      |      |      |      |     |      |      |      |  |
| Best  |  | 4.4  | 0.0  | 0.0  | 3.3  | 43.5 | 5.5  | 0.0  | 13.6 | 17.4 | 0.2  | 0.1  | 0.0  | 6.3 | 0.0  | 0.0  |      |  |
| 0.0   |  | 0.0  | 0.5  | 5.2  |      |      |      |      |      |      |      |      |      |     |      |      |      |  |
| 2nd   |  | 9.0  | 0.1  | 0.1  | 3.7  | 13.1 | 14.9 | 0.1  | 11.9 | 26.0 | 1.0  | 0.2  | 0.0  | 7.2 | 0.0  | 0.0  |      |  |
| 0.1   |  | 0.0  | 1.1  | 11.7 |      |      |      |      |      |      |      |      |      |     |      |      |      |  |
| 3rd   |  | 11.3 | 0.5  | 0.2  | 2.9  | 7.5  | 22.3 | 0.5  | 8.5  | 19.7 | 2.0  | 0.6  | 0.0  | 6.7 | 0.0  | 0.0  | 0.0  |  |
| 0.0   |  | 1.7  | 15.6 |      |      |      |      |      |      |      |      |      |      |     |      |      |      |  |
| 4th   |  | 13.6 | 1.6  | 1.2  | 2.7  | 6.1  | 22.4 | 1.3  | 7.9  | 13.6 | 3.8  | 1.1  | 0.0  | 6.5 | 0.0  | 0.1  | 0.1  |  |
| 0.0   |  | 2.2  | 15.7 |      |      |      |      |      |      |      |      |      |      |     |      |      |      |  |
| 5th   |  | 14.3 | 4.5  | 3.5  | 3.4  | 5.4  | 15.7 | 2.1  | 7.7  | 9.0  | 6.6  | 1.6  | 0.0  | 6.5 | 0.1  | 0.5  | 0.3  |  |
| 0.0   |  | 3.4  | 15.3 |      |      |      |      |      |      |      |      |      |      |     |      |      |      |  |
| 6th   |  | 12.7 | 9.4  | 7.8  | 3.6  | 4.3  | 9.8  | 3.8  | 6.4  | 6.0  | 8.8  | 2.6  | 0.1  | 6.8 | 0.1  | 1.1  | 0.5  |  |
| 0.0   |  | 4.4  | 11.9 |      |      |      |      |      |      |      |      |      |      |     |      |      |      |  |
| 7th   |  | 10.5 | 14.7 | 11.9 | 3.1  | 3.0  | 5.3  | 4.6  | 6.1  | 3.6  | 10.3 | 3.4  | 0.2  | 6.3 | 0.1  | 2.0  |      |  |
| 0.6   |  | 0.0  | 5.4  | 9.0  |      |      |      |      |      |      |      |      |      |     |      |      |      |  |
| 8th   |  | 8.1  | 17.0 | 15.3 | 3.3  | 2.6  | 2.3  | 5.8  | 4.9  | 2.3  | 11.1 | 4.0  | 0.3  | 6.1 | 0.2  | 3.9  | 1.0  |  |
| 0.0   |  | 5.7  | 6.1  |      |      |      |      |      |      |      |      |      |      |     |      |      |      |  |
| 9th   |  | 5.3  | 17.0 | 16.1 | 3.7  | 2.4  | 1.1  | 6.3  | 4.8  | 1.2  | 12.0 | 5.2  | 0.8  | 5.5 | 0.3  | 6.9  | 1.3  |  |
| 0.0   |  | 6.0  | 4.2  |      |      |      |      |      |      |      |      |      |      |     |      |      |      |  |
| 10th  |  | 4.2  | 14.3 | 16.4 | 3.9  | 1.9  | 0.5  | 8.2  | 4.6  | 0.7  | 11.0 | 5.3  | 1.5  | 5.5 | 0.4  | 9.8  |      |  |
| 1.7   |  | 0.0  | 7.5  | 2.5  |      |      |      |      |      |      |      |      |      |     |      |      |      |  |
| 11th  |  | 2.8  | 10.1 | 13.1 | 4.2  | 2.2  | 0.2  | 9.6  | 3.8  | 0.4  | 10.1 | 8.0  | 3.2  | 5.7 | 0.6  | 13.6 |      |  |
| 2.8   |  | 0.2  | 7.8  | 1.5  |      |      |      |      |      |      |      |      |      |     |      |      |      |  |
| 12th  |  | 1.6  | 6.2  | 8.2  | 4.5  | 1.6  | 0.0  | 11.0 | 4.4  | 0.1  | 8.8  | 8.9  | 5.6  | 5.7 | 1.2  | 17.7 | 3.7  |  |
| 0.9   |  | 9.1  | 0.8  |      |      |      |      |      |      |      |      |      |      |     |      |      |      |  |
| 13th  |  | 1.2  | 2.9  | 4.1  | 5.0  | 2.0  | 0.0  | 11.4 | 4.0  | 0.1  | 6.3  | 10.1 | 9.1  | 5.4 | 2.0  | 18.1 |      |  |
| 5.2   |  | 3.1  | 9.5  | 0.5  |      |      |      |      |      |      |      |      |      |     |      |      |      |  |
| 14th  |  | 0.6  | 1.2  | 1.7  | 5.8  | 1.3  | 0.0  | 11.0 | 3.1  | 0.0  | 4.6  | 11.6 | 13.1 | 5.0 | 3.0  | 12.8 |      |  |
| 7.1   |  | 9.3  | 8.8  | 0.1  |      |      |      |      |      |      |      |      |      |     |      |      |      |  |
| 15th  |  | 0.3  | 0.3  | 0.4  | 6.5  | 0.8  | 0.0  | 8.6  | 2.4  | 0.0  | 2.3  | 9.9  | 15.3 | 4.2 | 3.6  | 8.1  | 9.4  |  |
| 19.7  |  | 8.2  | 0.0  |      |      |      |      |      |      |      |      |      |      |     |      |      |      |  |
| 16th  |  | 0.1  | 0.1  | 0.1  | 5.9  | 0.7  | 0.0  | 6.2  | 1.9  | 0.0  | 0.9  | 9.4  | 17.3 | 3.2 | 5.6  | 3.6  | 11.2 |  |
| 27.4  |  | 6.4  | 0.0  |      |      |      |      |      |      |      |      |      |      |     |      |      |      |  |
| 17th  |  | 0.0  | 0.0  | 0.0  | 7.3  | 0.7  | 0.0  | 5.0  | 1.7  | 0.0  | 0.3  | 8.4  | 16.9 | 2.7 | 9.5  | 1.3  | 14.6 |  |
| 25.8  |  | 5.6  | 0.0  |      |      |      |      |      |      |      |      |      |      |     |      |      |      |  |
| 18th  |  | 0.0  | 0.0  | 0.0  | 11.5 | 0.6  | 0.0  | 3.3  | 1.5  | 0.0  | 0.0  | 6.6  | 12.1 | 3.4 | 21.7 | 0.5  |      |  |
| 22.2  |  | 12.1 | 4.5  | 0.0  |      |      |      |      |      |      |      |      |      |     |      |      |      |  |
| Worst |  | 0.0  | 0.0  | 0.0  | 15.7 | 0.3  | 0.0  | 1.1  | 0.7  | 0.0  | 0.0  | 2.9  | 4.3  | 1.4 | 51.8 | 0.1  |      |  |
| 18.2  |  | 1.5  | 2.1  | 0.0  |      |      |      |      |      |      |      |      |      |     |      |      |      |  |
| ----- |  |      |      |      |      |      |      |      |      |      |      |      |      |     |      |      |      |  |
| ----- |  |      |      |      |      |      |      |      |      |      |      |      |      |     |      |      |      |  |

STEP4  
loop inconsistency test

|        |
|--------|
| +----- |
| -----+ |

| Loop_Heterog_tau2 | Loop                                      | IF    | seIF  | z_value | p_value | CI_95       |
|-------------------|-------------------------------------------|-------|-------|---------|---------|-------------|
|                   | Semaglutide 0.5mg-Semaglutide 1mg-DPP4i   | 0.379 | 0.880 | 0.431   | 0.667   | (0.00,2.10) |
|                   | Semaglutide 0.5mg-Semaglutide 1mg-Placebo | 0.247 | 0.449 | 0.549   | 0.583   | (0.00,1.13) |
|                   | Semaglutide 0.5mg-Semaglutide 1mg-Insulin | 0.152 | 2.043 | 0.075   | 0.941   | (0.00,4.16) |

| Loop  | ROR   | z_value | p_value | CI_95        | Loop_Heterog_tau2 |
|-------|-------|---------|---------|--------------|-------------------|
| A-B-E | 1.461 | 0.431   | 0.667   | (1.00,8.19)  | 0.000             |
| A-B-D | 1.280 | 0.549   | 0.583   | (1.00,3.09)  | 0.000             |
| A-B-C | 1.165 | 0.075   | 0.941   | (1.00,63.82) | 0.000             |

node-splitting method

| Side  | Direct    | Indirect  | Difference |           |           |           |       |
|-------|-----------|-----------|------------|-----------|-----------|-----------|-------|
|       | Coef.     | Std. Err. | Coef.      | Std. Err. | Coef.     | Std. Err. | P> z  |
| A B   | .         | .         | .          | .         | .         | .         | .     |
| A C * | -3.160776 | 1.458835  | -3.555979  | 1.618329  | .395203   | .9598153  | 0.681 |
| A D * | -1.82034  | .2826938  | -2.290948  | .5737178  | .4706073  | .575731   | 0.414 |
| A E * | -2.253219 | .6127507  | -1.491297  | .790205   | -.7619215 | .6384198  | 0.233 |
| B C * | -3.717706 | 1.446585  | -3.322503  | 1.650988  | -.395203  | .9598153  | 0.681 |
| B D * | -2.343583 | .2693367  | -1.872976  | .5926826  | -.4706075 | .575731   | 0.414 |
| B E * | -2.401896 | .6088614  | -3.163817  | .7991732  | .7619215  | .6384198  | 0.233 |

Inconsistency Model

|                      |
|----------------------|
| chi2( 2) = 0.82      |
| Prob > chi2 = 0.6634 |

| Treatment estimate (sm = 'OR', comparison: other treatments vs 'D'): |                          |       |          |
|----------------------------------------------------------------------|--------------------------|-------|----------|
| OR                                                                   | 95%-CI                   | z     | p-value  |
| A                                                                    | 0.1528 [0.0894; 0.2612]  | -6.87 | < 0.0001 |
| B                                                                    | 0.0996 [0.0592; 0.1676]  | -8.69 | < 0.0001 |
| C                                                                    | 3.9072 [0.2276; 67.0713] | 0.94  | 0.3475   |
| D                                                                    | .                        | .     | .        |
| E                                                                    | 1.2539 [0.3511; 4.4785]  | 0.35  | 0.7276   |

Quantifying heterogeneity / inconsistency:  
tau^2 = 0; tau = 0; I^2 = 0% [0.0%; 79.2%]

Design-specific decomposition of within-designs Q statistic

| Design      | Q    | df | p-value |
|-------------|------|----|---------|
| D vs A vs B | 1.62 | 2  | 0.4459  |

SUCRA

| Treatment         | SUCRA | PrBest | MeanRank |
|-------------------|-------|--------|----------|
| Semaglutide 0.5mg | 74.8  | 0.8    | 2.0      |
| Semaglutide 1mg   | 99.6  | 98.6   | 1.0      |
| Insulin           | 10.9  | 0.7    | 4.6      |
| Placebo           | 36.5  | 0.0    | 3.5      |
| DPP4i             | 28.2  | 0.0    | 3.9      |

| study and Rank | Treatment |      |      |      |      |
|----------------|-----------|------|------|------|------|
|                | A         | B    | C    | D    | E    |
| 1 Best         | 0.8       | 98.6 | 0.7  | 0.0  | 0.0  |
| 2nd            | 97.8      | 1.4  | 0.8  | 0.0  | 0.0  |
| 3rd            | 1.4       | 0.0  | 13.7 | 53.6 | 31.3 |
| 4th            | 0.0       | 0.0  | 11.1 | 38.7 | 50.1 |
| Worst          | 0.0       | 0.0  | 73.8 | 7.7  | 18.6 |
